# Supplementary material for: Using Mobile Health Intervention to Improve Secondary Prevention of Coronary Heart Diseases in China: Mixed-Methods Feasibility Study
Source: PubMed Central journal article supplement (PMC5806005; doi:10.2196/mhealth.7849), 2018-01-25
Supplement: mhealth_v6i1e9_app1.pdf [file mhealth_v6i1e9_app1.pdf]

Table 1. Full model results

|                          | Odds ratio | SE   | Z     | P> z  | 95% CI |      |
|--------------------------|------------|------|-------|-------|--------|------|
| Time                     | 1.80       | 0.42 | 2.51  | 0.012 | 1.14   | 2.85 |
| Region                   | 1.73       | 0.54 | 1.76  | 0.079 | 0.94   | 3.21 |
| Age <50                  | 1.20       | 0.73 | 0.30  | 0.765 | 0.36   | 3.95 |
| Age 50-59                | 1.48       | 0.89 | 0.66  | 0.509 | 0.46   | 4.78 |
| Age 60-69                | 1.86       | 1.13 | 1.02  | 0.307 | 0.56   | 6.14 |
| Age 70-79                | 1.92       | 1.34 | 0.94  | 0.350 | 0.49   | 7.51 |
| Diagnosed 1 year ago     | 0.87       | 0.25 | -0.47 | 0.639 | 0.49   | 1.54 |
| Hypertension             | 1.15       | 0.33 | 0.49  | 0.624 | 0.65   | 2.03 |
| Diabetes                 | 1.03       | 0.30 | 0.10  | 0.921 | 0.58   | 1.83 |
| Took 2 medicines         | 3.11       | 1.50 | 2.35  | 0.019 | 1.21   | 8.01 |
| Took 3 or more medicines | 2.66       | 1.21 | 2.15  | 0.031 | 1.09   | 6.50 |

Table 2. Model results with region as interaction term

|                          | Odds ratio | SE    | Z     | P> z  | 95% CI |       |
|--------------------------|------------|-------|-------|-------|--------|-------|
| Time                     | 0.61       | 0.19  | -1.58 | 0.114 | 0.33   | 1.12  |
| Region                   | 0.57       | 0.23  | -1.39 | 0.163 | 0.26   | 1.26  |
| TimeXregion              | 23.93      | 14.83 | 5.12  | 0.000 | 7.10   | 80.61 |
| Age <50                  | 1.23       | 0.88  | 0.29  | 0.770 | 0.30   | 4.98  |
| Age 50-59                | 1.66       | 1.16  | 0.72  | 0.470 | 0.42   | 6.52  |
| Age 60-69                | 2.14       | 1.52  | 1.07  | 0.285 | 0.53   | 8.61  |
| Age 70-79                | 2.25       | 1.81  | 1.00  | 0.315 | 0.46   | 10.91 |
| Diagnosed 1 year ago     | 0.86       | 0.29  | -0.44 | 0.660 | 0.45   | 1.65  |
| Hypertension             | 1.23       | 0.41  | 0.64  | 0.522 | 0.65   | 2.35  |
| Diabetes                 | 0.97       | 0.32  | -0.10 | 0.924 | 0.51   | 1.86  |
| Took 2 medicines         | 3.33       | 1.81  | 2.21  | 0.027 | 1.15   | 9.69  |
| Took 3 or more medicines | 2.74       | 1.41  | 1.96  | 0.050 | 1.00   | 7.50  |

|                  |       |      |      |       |      |       |
|------------------|-------|------|------|-------|------|-------|
| Time+TimeXRegion | 14.68 | 7.77 | 5.07 | 0.000 | 5.20 | 41.45 |
|------------------|-------|------|------|-------|------|-------|
